# Supplementary material
Source: PubMed Central journal article supplement (PMC4079373)
Supplement: supp_tpc.114.126037_tpc126037_Supplemental.pdf [file supp_tpc.114.126037_tpc126037_Supplemental.pdf]

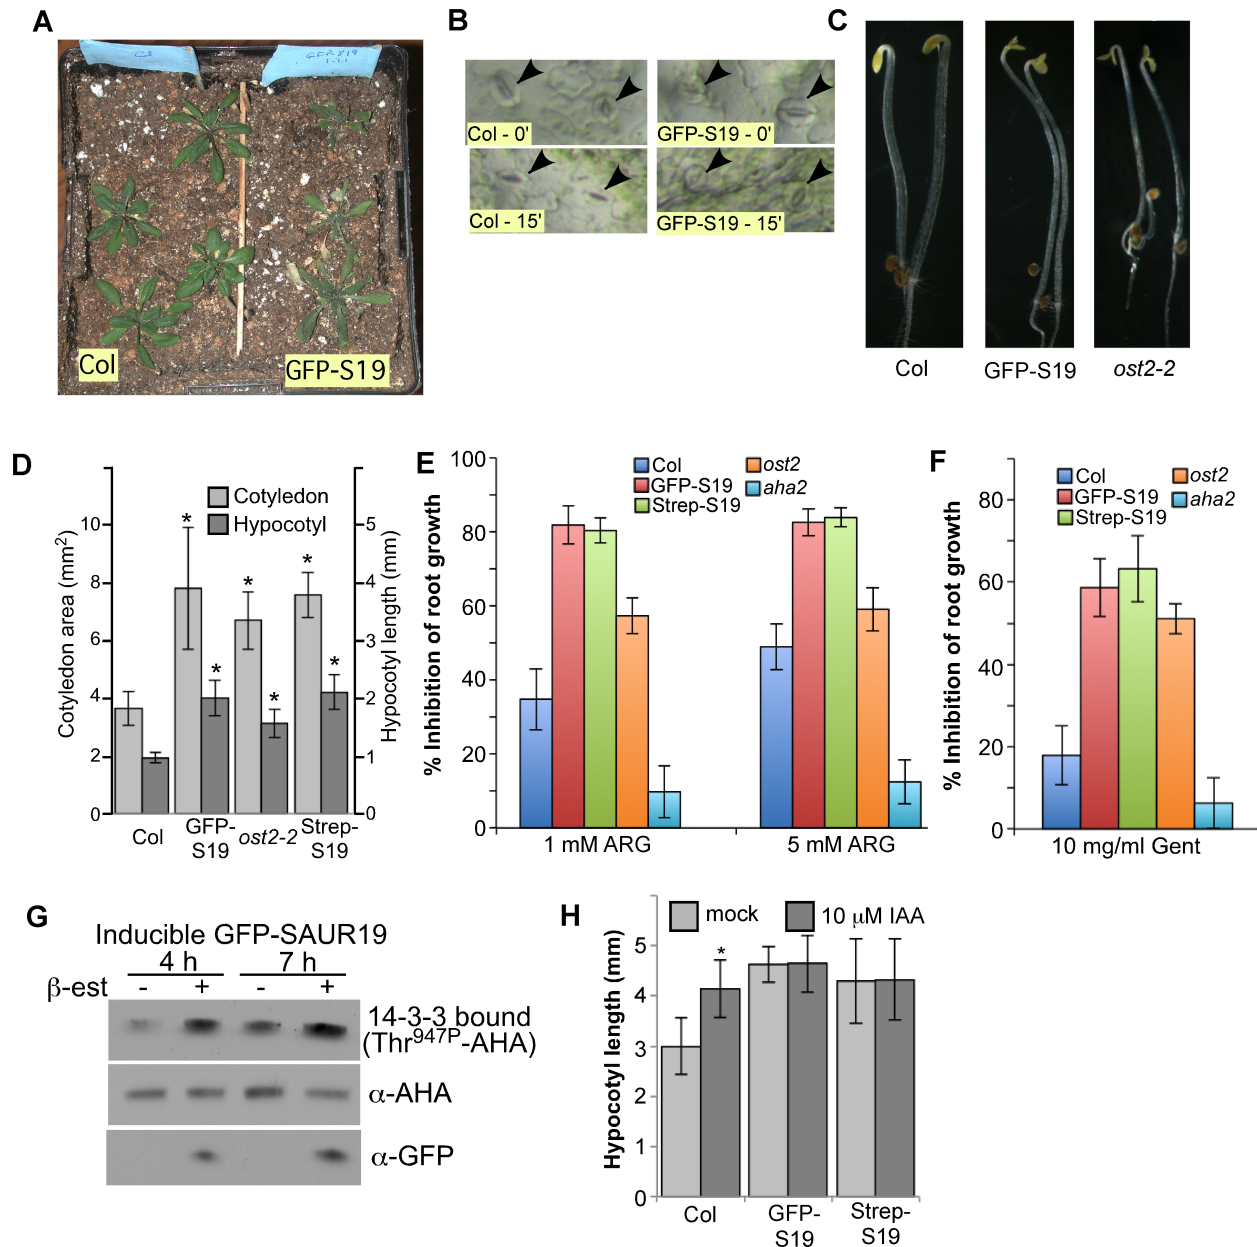

**Supplemental Figure 1. Additional phenotypes of SAUR19 overexpression plants.** (A) Three-week-old Col and GFP-SAUR19 plants photographed 10 days after cessation of watering. (B) Stomatal apertures (arrowheads) of Col and GFP-SAUR19 leaves immediately after excision from plant (top) or 15 min after excision (bottom). (C) Five-day-old etiolated seedlings. (D) Hypocotyl length and cotyledon area of 8 d.o. seedlings. Root growth on media containing arginine (E) or gentamicin (F). Four-day-old seedlings were transferred from ATS plates to media containing supplements and grown an additional 4 days. Values indicate the mean inhibition of root growth ( $n=16$ )  $\pm$  sd. (G) Five-day-old Col seedlings harboring an estrogen-inducible GFP-SAUR19 transgene were induced with 10  $\mu$ M  $\beta$ -estradiol. AHA C-terminal phosphorylation status was then assessed by GST-14-3-3 far western blotting of microsomal extracts. (H) Three-day-old seedlings were transferred to mock or IAA supplemented media and

grown an additional 3 days. Seedlings were grown under yellow filters to slow IAA degradation. Values indicate the mean ( $n \geq 12$ )  $\pm$  sd. Asterisk indicates significant effect of IAA versus mock-treated control as determined by one-way ANOVA;  $P < 0.01$ .

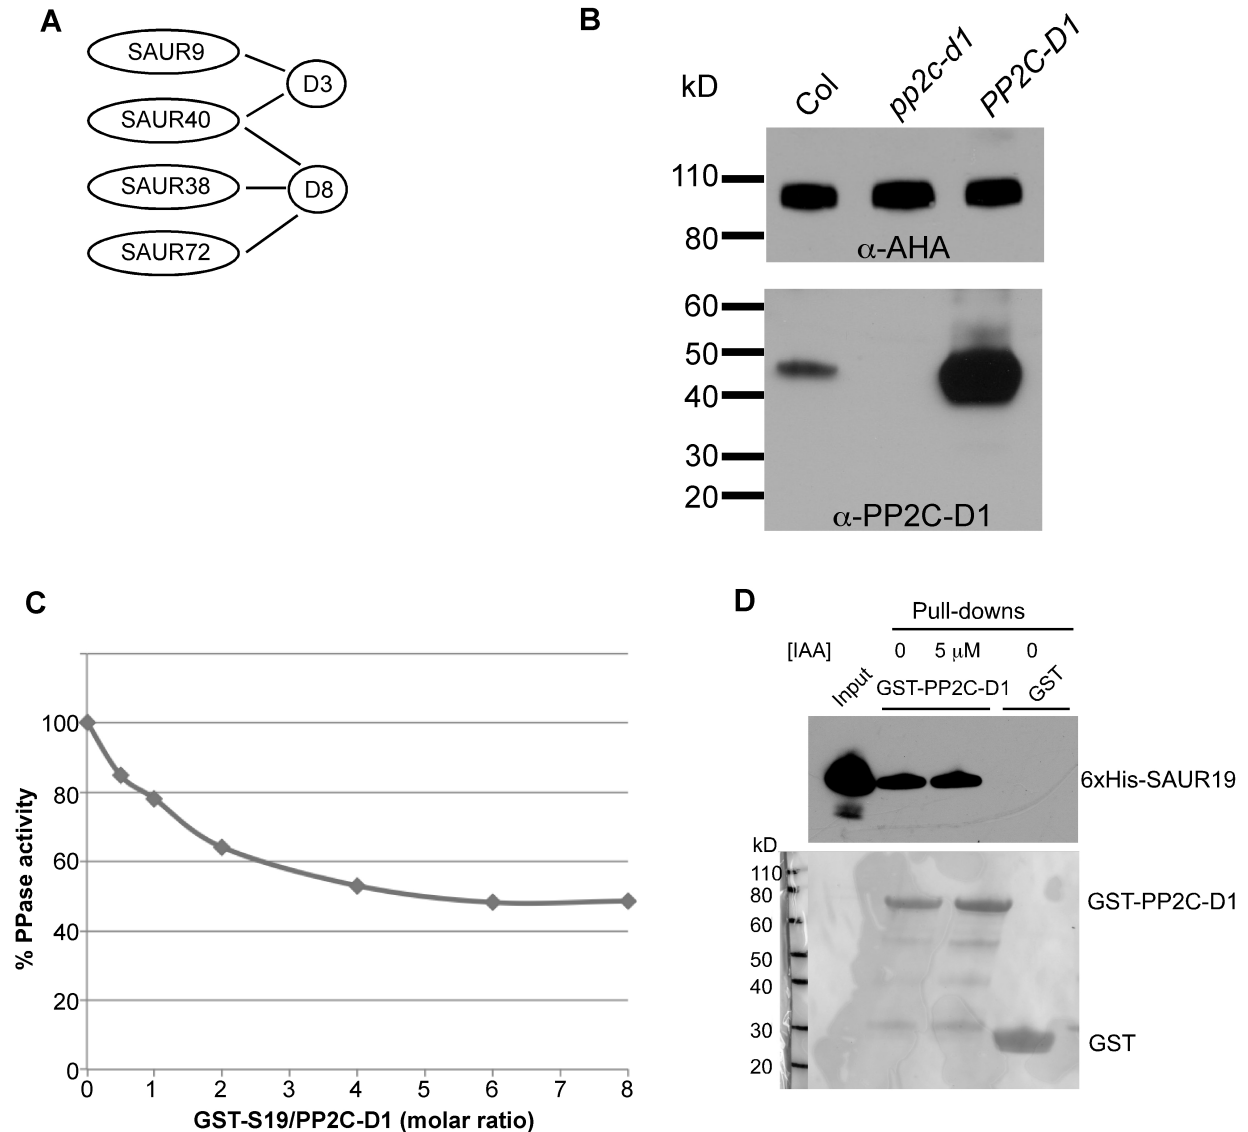

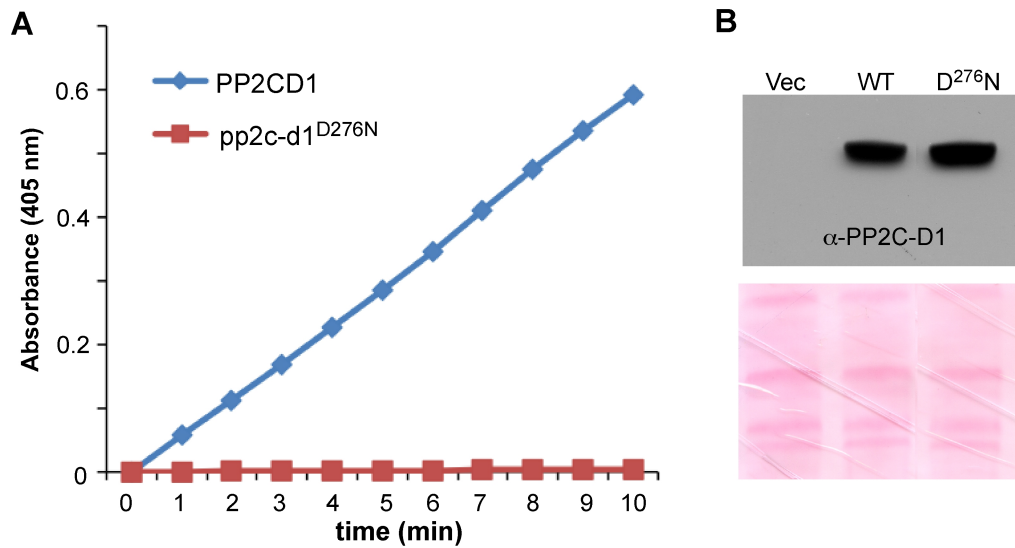

**Supplemental Figure 3. The D276N mutation abolishes phosphatase activity of PP2C-D1.** (A) pNPP phosphatase assays containing 0.5  $\mu$ M recombinant GST-PP2C-D1 or GST-pp2c-d1<sup>D276N</sup>. (B) PP2C-D1 immunoblot analysis of RS-72 yeast cells carrying the empty expression vector (vec) or PP2C-D1 expression constructs. The Ponceau S stained blot is shown below as a loading control.

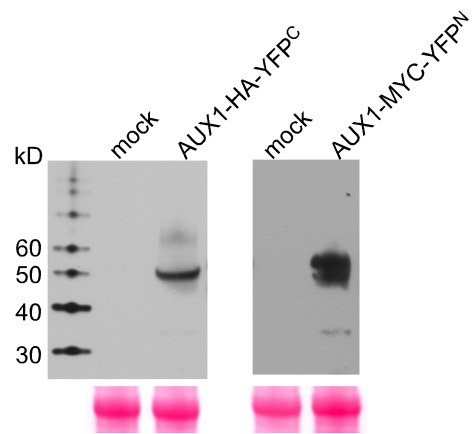

**Supplemental Figure 4. Expression of AUX1 BiFC constructs in tobacco.**

Microsomal extracts prepared from tobacco leaves infiltrated with AUX split YFP expression vectors or mock control were immunoblotted with HA or c-myc antibodies. Ponceau S staining of the large subunit of RuBisCo is shown as a loading control.

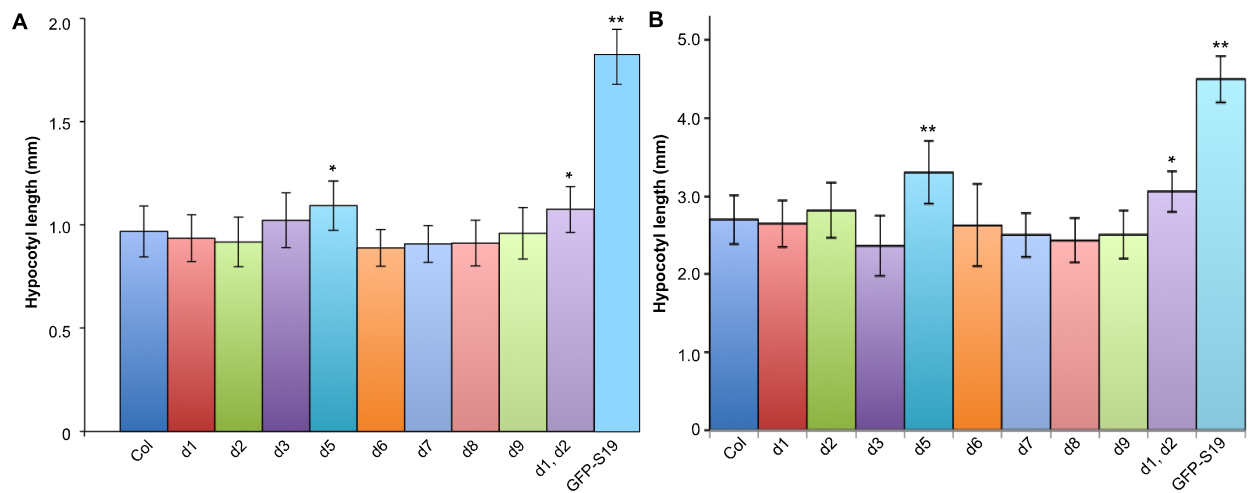

**Supplemental Figure 5. Hypocotyl lengths of 7 d.o. *pp2c-d* mutants.** Seedlings were grown under 65 (**A**) or 30  $\mu\text{E m}^{-2} \text{s}^{-1}$  (**B**) Wc light; Mean ( $n \geq 25$ )  $\pm$  sd. Asterisks indicate significant difference from Col control (One-way ANOVA; \* $P < 0.05$ ; \*\* $P < 0.01$ ).

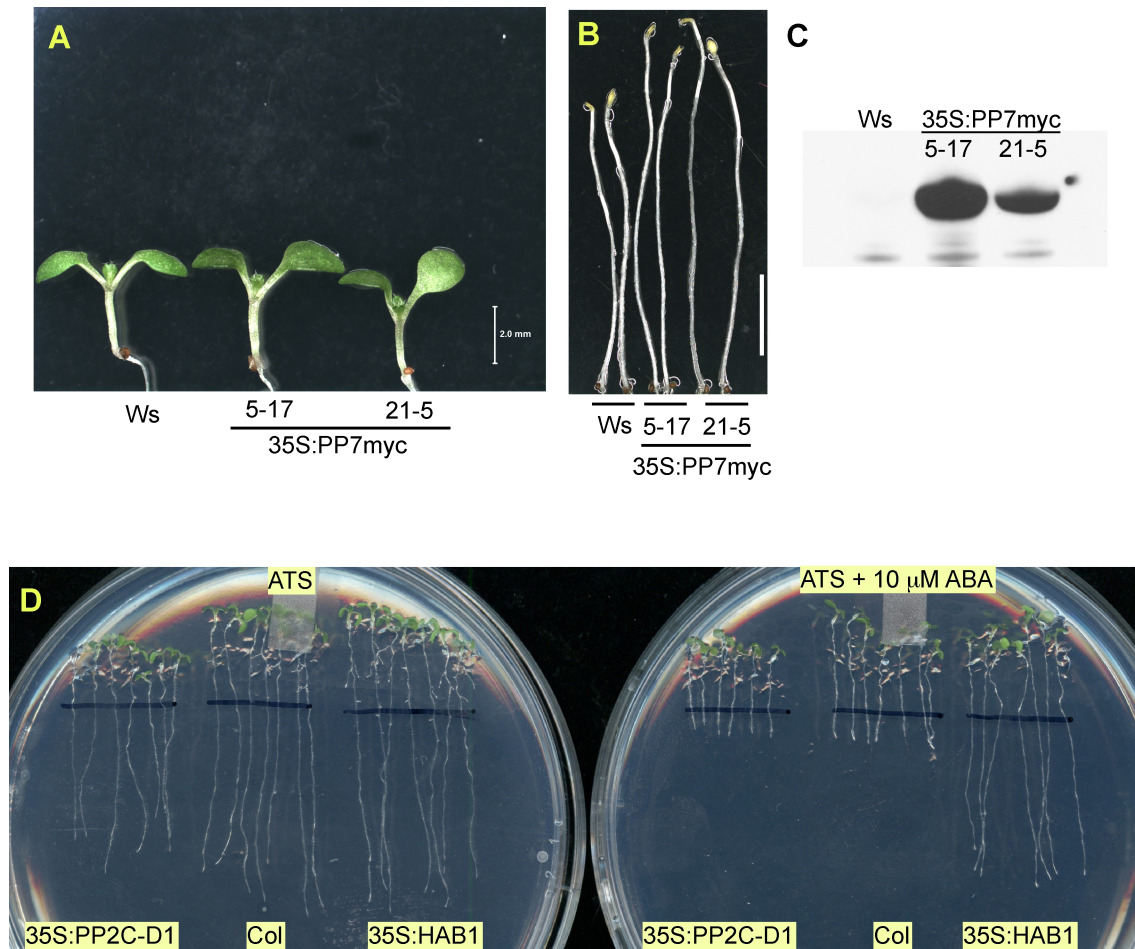

**Supplemental Figure 6. Phosphatase overexpression controls.** Seedlings expressing a 35S:*PP7myc* transgene do not exhibit short hypocotyls in the light (A) or dark (B). Size bars = 2 mm (A) or 5 mm (B). (C)  $\alpha$ -myc immunoblot of extracts prepared from the 35S:*PP7myc* seedlings shown in panel A. (D) 35S:*HAB1*, but not 35S:*PP2C-D1* confers resistance to ABA. 4 d.o. seedlings were transferred to ATS media  $\pm$  10  $\mu$ M ABA and grown another 5 days. Black line indicates position of the root tips at the time of transfer.

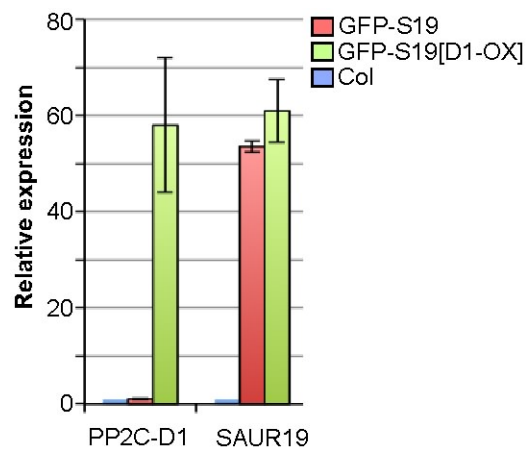

**Supplemental Figure 7. Quantitative RT-PCR analysis of GFP-*SAUR19* and *PP2C-D1* overexpression.** Values represent the mean  $\pm$  sd of 3 biological replicates with 7 d.o. seedlings.



**Table 1. Primers used in this study.**

| gene                        | Primer sequence                                                                                                                            |
|-----------------------------|--------------------------------------------------------------------------------------------------------------------------------------------|
| <i>ABI1</i>                 | F: GGGGACAAGTTTGTACAAAAAAGCAGGCTG<br>CATGGAGGAAGTATCTCCGGCGATCG<br><br>R: GGGGACCACTTTGTACAAGAAAGCTGGGTAAGCTTA<br>TCAGTTCAAGGGTTTGCTCTTGAG |
| <i>PP2C-D1</i><br>At5g02760 | F: GGGGACAAGTTTGTACAAAAAAGCAG<br>GCTGCATGGTTAAACCCTGTTGGAGAATAG<br><br>R: GGGGACCACTTTGTACAAGAAAGC<br>TGGGTAAGCTTATCATGATGTTGAATGCATCGGG   |
| <i>PP2C-D5</i><br>At4g38520 | F: GGGGACAAGTTTGTACAAAAAAGCAGGCTGCA<br>TGCTATCTGGGTTGATGAATTTTC<br><br>R: GGGGACCACTTTGTACAAGAAAGCTGGGTAAGC<br>TTATCAGGAGGCCAGCAGCAGCAG    |
| <i>PP2C-D6</i><br>At3g51370 | F: GGGGACAAGTTTGTACAAAAAAGCAGGCTGC<br>ATGTTATCAACGTTAATG<br><br>R: GGGGACCACTTTGTACAAGAAAGCTGGGTAAGCTTA<br>TTAGATTTTCTTGGGGAATG            |
| <i>PP2C-D7</i><br>At5g66080 | F: GGGGACAAGTTTGTACAAAAAAGCAGGCTGCATG<br>TTATCCCTTTTCTTCAACTTTTTC<br><br>R: GGGGACCACTTTGTACAAGAAAGCTGGGTAAGCTTA<br>TTAAAGTTTCTTAGGTAAAGTG |
| <i>PP2C-D9</i><br>At5g06750 | F: GGGGACAAGTTTGTACAAAAAAGCAGG<br>CTGCATGTTCTCCTGGTTAGC<br><br>R: GGGGACCACTTTGTACAAGAAAGCTGGGTAA<br>GCTTACTAAGAGAGGAAGATACTG              |
| <i>SAUR9</i><br>At4g36110   | F: GGGGACAAGTTTGTACAAAAAAGCAGGCTGCATGGC<br>GATAAAGAAGTCGAAC<br><br>R: GGGGACCACTTTGTACAAGAAAGCTGGGTAAGCTTA<br>TTATCTGAACATTGA GATGAG       |
| <i>SAUR19</i><br>At5g18010  | F: GGGGACAAGTTTGTACAAAAAAGCAGGCTGC<br>AGGATGGCTTTCGTGAGAAGTCTATTGG<br><br>R: GGGGACCACTTTGTACAAGAAAGCTGGGTTCT<br>AGATCATTGGAGCCGAGAAGTCAC  |
| <i>SAUR40</i><br>At1g79130  | F: GGGGACAAGTTTGTACAAAAAAGCAGGCTGCA<br>TGAAGCCTCTGATTGAC<br><br>R: GGGGACCACTTTGTACAAGAAAGCTGGGTAAG<br>CTTACTACTCTGTAGA TACATCTTC          |
| <i>SAUR72</i><br>At3g12830  | F: GGGGACAAGTTTGTACAAAAAAGCAGGCTGCATGAA<br>GCAACTAATCCGTCGT                                                                                |

|                                         |                                                                                                                                                                                                                                                                                                                                                                                                                                                                                                                                                                                                                                                  |
|-----------------------------------------|--------------------------------------------------------------------------------------------------------------------------------------------------------------------------------------------------------------------------------------------------------------------------------------------------------------------------------------------------------------------------------------------------------------------------------------------------------------------------------------------------------------------------------------------------------------------------------------------------------------------------------------------------|
|                                         | R: GGGGACCACTTTGTACAAGAAAGCTGGGTAAGCTTA<br>TCAAATAGTCCCGTCACCGA                                                                                                                                                                                                                                                                                                                                                                                                                                                                                                                                                                                  |
| pp2c-d<br>T-DNA<br>genotyping           | d1: CACAAGATCCATAGGTGATGC/TGCCCTTGACACAGGAAGTG<br>d2: GTATCGAGGTCTATAGGAGAC/CGCTGCCTCGTGAAGAGCCG<br>d3: CAGATTGTGGTCTTGAAGCAC/GTGTTCACAATGTCAACAGC<br>d5: CATCTGCGATGGGAAGCTAT/CAAACAGAGTGGGGTGTGTG<br>d6: CGCTTTGACGGATGTGGAGG/GCTTGAACAACAGCCATGGAG<br>d7: GAAAGCTTAGTTGTCTGTGTG/GCTGCCTCCTGCAGCGCAGC<br>d8: CCCTGATGACTCACAAATCG/GACGGATTCTGGAACATTGC<br>d9: GGATGTTCTCCTGGTTAGCGAG/GATGATCAGAGATGTATCTAG                                                                                                                                                                                                                                     |
| <i>PPase</i><br>cloning into<br>pMP1612 | D1; F: AAGCGGCCGCGAGAAGATGGTTAAACCCTGTTGGAGAATAG<br>D2; R: AAGCGGCCGCTCATGATGTTGAATGCATCGGGTATCC<br><br>D5; F: ataagaatGCGGCCGCATGCTATCTGGGTTGATGAATTTTCT<br>D5; R: ataagaatGCGGCCGCTCAGGAGGCGCCAGCAGCAGCAG<br><br>PP7; F: ataagaatGCGGCCGCATGGAAACTGTTCCACCATCTCC<br>PP7; R: ataagaatGCGGCCGCTCAGCTATTTGGTTGTTTCGTTATT<br><br>At1g43900; F: ataagaatGCGGCCGCATGAAGAAAAGTAGAAATGTTGC<br>At1g43900; R: ataagaatGCGGCCGCTCAAGAAAACCTCGAATCGTACAAC                                                                                                                                                                                                  |
| qRT-PCR                                 | PDF1.2-F: TGTTCTCTTTGCTGCTTTTCGACGC<br>PDF1.2-R: TGTGTGCTGGGAAGACATAGTTGC<br><br>PR1-F: AGTATGGCTTCTCGTTCACA<br>PR1-R: GGAGCTACGCAGAACAACACTA<br><br>SAUR19-F: GATTCTAAGCCGCTCCAC<br>SAUR19-R: CCGAGAAGTCACATTGATG<br><br>PP2CD1-F: GGGCAGATCTGAGAGAGGTG<br>PP2CD1-R: CCGCACTAAGGATTGGCTTA<br><br>PP2CD2-F: TCGTTGGGAAGTCAAGGACT<br>PP2CD2-R: AATGTCGTCTCACTTTCTTGTC<br><br>PP2CD3-F: CAAGGCCGTTTCAGTTATCGT or AAAGTTTGGCGTGTCAAAGG<br>PP2CD3-R: CCCTGAACTTTGCCAACAAT or GTCTCCGCACTCCTCTATCG<br><br>PP2CD4-F: TGCAAGTATCGAATCTGTGAGAG<br>PP2CD5-R: CCGAATGCCACGTTCTATCT<br><br>PP2CD5-F: CGCGGATGATTCTGGACTAT<br>PP2CD5-R: TCTGGCGAGTAAAAGGCATC |

|                                 |                                                                                                                                                                                                                                                                                                                                                          |
|---------------------------------|----------------------------------------------------------------------------------------------------------------------------------------------------------------------------------------------------------------------------------------------------------------------------------------------------------------------------------------------------------|
|                                 | PP2CD6-F: AACGGAGCATGAGATCCAAC<br>PP2CD6-R: CGTGGAAATGTCTCCTCACA<br><br>PP2CD7-F: CAATGTCTGGCGTGTTAAGG<br>PP2CD7-R: CATGGAAATGCCTCCTGACT<br><br>PP2CD8-F: GCCGTAGCTGAACGGTTATC<br>PP2CD8-R: CCAGAGACCATCTGATGCAA<br><br>PP2CD9-F: TGCTTGGTTCCATGGGTAGT<br>PP2CD9-R: TTCTTCAGCGAGATGGAACC<br><br>ACT7-F: GAGAAGATGACTCAGATC<br>ACT7-R: ATCCTTCCTGATATCGAC |
| <i>AHA2</i><br>Gateway          | F: CACCATGTCGAGTCTCGAAGATATC<br>R: GACAGTGTAGTGACTGGGAGTTTC                                                                                                                                                                                                                                                                                              |
| <i>pp2c-d1</i> <sup>D276N</sup> | F: GTTTATAATTCTTGCTTCAaATGGGCTTTGGGAGCATC<br>R: GATGCTCCCAAAGCCCATtTGAAGCAAGAATTATAAAC                                                                                                                                                                                                                                                                   |
| <i>AUX1</i><br>Gateway          | F: CACCATGTCGGAAGGAGTAGAAGC<br>R: AAGACGGTGGTGTAAAGCGGAG                                                                                                                                                                                                                                                                                                 |
| <i>amiD2/5/7/8/9</i>            | AMI-S: GATGATACCTGAATGATGCCCTTTCTCTCTTTTGTATTCC<br>AMI-A: GAAAGGGCATCATTGAGGTATCATCAAAGAGAATCAATGA<br>AMI-S*: GAAAAGGCATCATTCTGGTATCTTCACAGGTCGTGATATG<br>AMI-A*: GAAGATACCAGAATGATGCCTTTTCTACATATATATTCCCT                                                                                                                                              |
